# Supplementary material for: A Dynamic rRNA Ribomethylome Drives Stemness in Acute Myeloid Leukemia
Source: Oxford University Press journal article supplement (doi:10.1158/2159-8290.cd-22-0210), 2022-10-19
Supplement: cd-22-0210_supplementary_tables_s1-s4_suppst1.xlsx [file cd-22-0210_supplementary_tables_s1-s4_suppst1.xlsx]

## Sheet: Table S1
species	pos	name	4UG0.name
18S	1031	18S-Am1031	18S-Am1031
28S	2411	28S-Gm2411	28S-Gm2424
28S	4032	28S-Cm4032	28S-Cm4053
28S	3904	28S-Um3904	28S-Um3925
28S	4426	28S-Cm4426	28S-Cm4465
28S	3680	28S-Cm3680	28S-Cm3701
28S	4197	28S-Um4197	28S-Um4227
28S	2351	28S-Gm2351	28S-Gm2364
18S	517	18S-Cm517	18S-Cm517
28S	391	28S-Am391	28S-Am400
28S	1511	28S-Am1511	28S-Am1524
28S	1747	28S-Gm1747	28S-Gm1760
28S	2350	28S-Am2350	28S-Am2363
18S	509	18S-Gm509	18S-Gm509
28S	4468	28S-Um4468	28S-Um4498
28S	1612	28S-Gm1612	28S-Gm1652
18S	512	18S-Am512	18S-Am512
18S	166	18S-Am166	18S-Am166
28S	3797	28S-Um3797	28S-Um3818
18S	1804	18S-Um1804	18S-Um1804
18S	1490	18S-Gm1490	18S-Gm1490
28S	3787	28S-Cm3787	28S-Cm3808
5.8S	75	5.8S-Gm75	5.8S-Gm75
28S	4198	28S-Gm4198	28S-Gm4228
28S	3878	28S-Gm3878	28S-Gm3899
18S	683	18S-Gm683	18S-Gm683
28S	4340	28S-Gm4340	28S-Gm4370
18S	590	18S-Am590	18S-Am590
28S	1509	28S-Gm1509	28S-Gm1522
28S	2338	28S-Cm2338	28S-Cm2351
28S	2824	28S-Um2824	28S-Um2837
28S	4464	28S-Gm4464	28S-Gm4494
18S	601	18S-Gm601	18S-Gm601
28S	4166	28S-Gm4166	28S-Gm4196
28S	1313	28S-Am1313	28S-Am1326
28S	2791	28S-Cm2791	28S-Cm2804
28S	2409	28S-Cm2409	28S-Cm2422
28S	3866	28S-Cm3866	28S-Cm3887
28S	3848	28S-Cm3848	28S-Cm3869
28S	2811	28S-Cm2811	28S-Cm2824
28S	4469	28S-Gm4469	28S-Gm4499
28S	1521	28S-Am1521	28S-Am1534
28S	4276	28S-Um4276	28S-Um4306
28S	3739	28S-Am3739	28S-Am3760
18S	159	18S-Am159	18S-Am159
18S	1288	18S-Um1288	18S-Um1288
28S	1858	28S-Am1858	28S-Am1871
18S	116	18S-Um116	18S-Um116
18S	1328	18S-Gm1328	18S-Gm1328
18S	172	18S-Um172	18S-Um172
28S	4506	28S-Cm4506	28S-Cm4536
18S	1326	18S_Um1326	18S_Um1326
28S	389	28S-Am389	28S-Am398
18S	428	18S-Um428	18S-Um428
18S	644	18S-Gm644	18S-Gm644
28S	1327	28S-Cm1327	28S-Cm1340
18S	484	18S-Am484	18S-Am484
18S	576	18S-Am576	18S-Am576
18S	867	18S-Gm867	18S-Gm867
18S	1442	18S-Um1442	18S-Um1442
28S	2848	28S-Cm2848	28S-Cm2861
28S	2802	28S-Am2802	28S-Am2815
18S	1678	18S-Am1678	18S-Am1678
28S	3804	28S-Am3804	28S-Am3825
28S	3846	28S-Am3846	28S-Am3867
28S	3771	28S-Gm3771	28S-Gm3792
18S	436	18S-Gm436	18S-Gm436
28S	2352	28S-Cm2352	28S-Cm2365
28S	3723	28S-Gm3723	28S-Gm3744
28S	2774	28S-Am2774	28S-Am2787
18S	27	18S-Am27	18S-Am27
28S	3697	28S-Am3697	28S-Am3718
28S	3923	28S-Gm3923	28S-Gm3944
28S	2388	28S-Am2388	28S-Am2401
18S	668	18S-Am668	18S-Am668
18S	797	18S-Cm797	18S-Cm797
28S	3809	28S-Am3809	28S-Am3830
5.8S	14	5.8S-Um14	5.8S-Um14
18S	1383	18S-Am1383	18S-Am1383
28S	3703	28S-Am3703	28S-Am3724
28S	4020	28S-Gm4020	28S-Gm4041
28S	2863	28S-Gm2863	28S-Gm2876
28S	1303	28S-Gm1303	28S-Gm1316
28S	4593	28S-Gm4593	28S-Gm4623
18S	99	18S-Am99	18S-Am99
28S	4590	28S-Um4590	28S-Um4620
28S	3820	28S-Cm3820	28S-Cm3841
28S	4493	28S-Am4493	28S-Am4523
18S	799	18S-Um799	18S-Um799
18S	1703	18S-Cm1703	18S-Cm1703
28S	2402	28S-Um2402	28S-Um2402
28S	3764	28S-Am3764	28S-Am3785
18S	1391	18S-Cm1391	18S-Cm1391
28S	1731	28S_Um1731	28S_Um1744
28S	4362	28S-Gm4362	28S-Gm4392
18S	462	28S-Gm462	18S-Cm462
18S	468	18S-Am468	18S-Am468
28S	2527	28S-Cm2527	28S-Cm2540
18S	121	18S-Um121	18S-Um121
28S	4607	28S-Gm4607	28S-Gm4607
28S	1868	28S-Cm1868	28S-Cm1881
28S	4560	28S-Am4560	28S-Am4590
28S	4588	28S-Gm4588	28S-Gm4618
28S	1029	28S_Gm1029	28S_Gm1042
28S	4541	28S-Am4541	28S-Am4571
18S	1272	18S-Cm1272	18S-Cm1272
18S	186	18S_Cm186	18S_Cm186
28S	4937	28S_Um4937	28S_Um4972
18S	174	18S-Cm174	18S-Cm174
18S	627	18S-Um627	18S-Um627
18S	1447	18S-Gm1447	18S-Gm1447

## Sheet: Table S2
name	DyMeC cluster
28S-Cm1327	1
18S-Um1442	1
28S-Am1858	1
28S-Gm3923	1
18S-Cm1272	1
18S-Am99	1
28S-Gm4362	1
28S_Um4937	1
28S_Um1731	1
18S_Cm186	1
28S-Cm4506	1
28S-Cm4506	1
28S-Am1521	1
18S_Um1326	1
18S-Gm1328	1
28S-Cm3866	1
18S-Am576	1
28S-Cm2848	2
28S-Gm1303	2
28S-Cm2352	2
28S-Gm2863	2
28S-Cm1868	2
18S-Gm1447	2
28S-Am2388	2
28S-Gm4020	2
28S-Am2774	2
28S-Gm4588	2
28S-Am4560	2
28S-Gm3723	2
28S-Um4590	2
18S-Cm174	2
28S-Gm4607	2
18S-Um428	2
28S-Am4541	2
28S-Cm3848	2
18S-Um116	2
28S-Am3846	2
28S-Um2402	2
5.8S-Um14	2
18S-Cm1391	3
18S-Am668	3
28S-Am4493	3
18S-Cm1703	3
18S-Um627	3
28S-Cm2338	3
28S-Am3764	4
28S-Am3703	4
28S-Gm4593	4
28S-Am3804	4
18S-Cm797	4
18S-Um1288	4
28S-Am3809	4
28S-Cm3820	4
18S-Um121	4
28S-Cm2527	4
18S-Um799	4
18S-Am484	4
28S-Am3697	4
28S-Am2802	4
28S_Gm1029	4
18S-Am1678	4
28S-Gm462	4
18S-Am468	4
18S-Am27	4

## Sheet: Table S3
name	4UG0.name	location
18S-Am159	18S-Am159	H8
18S-Am166	18S-Am166	H8
18S-Gm509	18S-Gm509	Internal loop:h15
18S-Cm517	18S-Cm517	Bulge loop:h4
18S-Gm644	18S-Gm644	h3
18S-Am1031	18S-Am1031	Bulge loop:h20
28S-Gm1612	28S-Gm1625	Internal loop: H33
28S-Gm1747	28S-Gm1760	facing to A-site tRNA
28S-Cm2409	28S-Cm2422	Haiprin loop: H50
28S-Gm2411	28S-Gm2424	Haiprin loop: H50
28S-Cm3680	28S-Cm3701	Bulge loop: H68
28S-Gm4166	28S-Gm4196	P-tRNA CCA binding pocket
28S-Gm4340	28S-Gm4370	E-tRNA binding site
28S-Um4468	28S-Um4498	PTC
28S-Gm4469	28S-Gm4499	PTC

## Sheet: Table S4
Ensemble ID	Gene Symbol	log2FC.mRNA.shFBLvs.shCtrl	FDR.mRNA.shFBLvs.Ctrl	log2FC.nascent protein.shFBLvs.shCtrl	P.Value.nascent protein.shFBLvs.Ctrl	adj.P.Val.nascent protein.shFBLvs.Ctrl
ENSG00000205213	LGR4	0.361277	0.08444	-3.97648	1.09e-05	0.00542529
ENSG00000163563	MNDA	-0.281134	0.322983	-3.82607	0.00173466	0.0243788
ENSG00000077984	CST7	0.38839	0.00277056	-3.55737	7.65e-06	0.00542529
ENSG00000100448	CTSG	-0.412542	6.36999e-05	-3.54669	0.000157828	0.0104733
ENSG00000197249	SERPINA1	-0.233464	0.0535209	-3.48107	0.000548895	0.0155043
ENSG00000152766	ANKRD22	-0.637358	0.000866267	-3.19999	1.23e-05	0.00542529
ENSG00000158517	NCF1	-0.691836	3.74531e-06	-3.18248	7.13e-06	0.00542529
ENSG00000005381	MPO	-0.40441	0.00301009	-3.17962	5.23e-06	0.00542529
ENSG00000168938	PPIC	0.661485	1.2607e-08	-2.8964	5.11e-05	0.00777889
ENSG00000106991	ENG	0.0677472	0.660898	-2.8264	0.000105908	0.00966
ENSG00000170891	CYTL1	0.211987	0.0726612	-2.68326	0.000314214	0.0125873
ENSG00000074416	MGLL	0.289944	0.0321069	-2.58248	0.00498992	0.0411095
ENSG00000113083	LOX	-0.00885495	0.976815	-2.50805	5.35e-06	0.00542529
ENSG00000197747	S100A10	0.56559	1.04722e-06	-2.4935	0.000561539	0.0156304
ENSG00000131981	LGALS3	0.559963	2.2026e-06	-2.42564	0.000268091	0.0122979
ENSG00000163110	PDLIM5	0.265537	0.146163	-2.35384	4.31e-05	0.00777889
ENSG00000092964	DPYSL2	-0.217564	0.203709	-2.29905	0.000355757	0.0130306
ENSG00000121552	CSTA	-0.16141	0.430618	-2.29092	9.6e-06	0.00542529
ENSG00000136167	LCP1	-0.355357	0.000632626	-2.28553	3.57e-05	0.00777889
ENSG00000148180	GSN	-0.509075	4.22524e-06	-2.25199	0.000215573	0.0114467
ENSG00000169385	RNASE2	-0.0854871	0.646652	-2.15757	0.000151919	0.0104733
ENSG00000104814	MAP4K1	0.214713	0.0856123	-2.15395	0.000344298	0.0130306
ENSG00000145335	SNCA	0.593152	5.25273e-05	-2.03952	2.12e-05	0.00721542
ENSG00000103490	PYCARD	0.199181	0.286387	-2.03796	3.08e-05	0.00777889
ENSG00000073737	DHRS9	-0.37817	0.042748	-2.00412	2.64e-05	0.00721542
ENSG00000076716	GPC4	0.0410923	0.85114	-1.95111	2.31e-05	0.00721542
ENSG00000135916	ITM2C	0.187455	0.138067	-1.89328	2.1e-05	0.00721542
ENSG00000136451	VEZF1	0.507918	0.00399645	-1.87668	0.00566097	0.0436878
ENSG00000100097	LGALS1	-0.0721861	0.68901	-1.85225	0.00010856	0.00966
ENSG00000184164	CRELD2	-0.105369	0.458182	-1.82107	3.65e-05	0.00777889
ENSG00000062038	CDH3	0.0676461	0.637659	-1.81874	2.54e-05	0.00721542
ENSG00000132205	EMILIN2	-0.317881	0.00963203	-1.81343	4.75e-05	0.00777889
ENSG00000145050	MANF	-0.647019	8.96982e-09	-1.7907	5.32e-05	0.00777889
ENSG00000138829	FBN2	0.385768	0.0454845	-1.75977	0.000591661	0.0160785
ENSG00000123983	ACSL3	-0.374533	0.0336957	-1.73173	9.71e-05	0.00966
ENSG00000115457	IGFBP2	0.323167	0.0391203	-1.70702	3.74e-05	0.00777889
ENSG00000100365	NCF4	-0.542524	0.000151254	-1.69969	0.000119757	0.00966
ENSG00000153933	DGKE	-0.186222	0.348595	-1.66267	0.000211353	0.0114467
ENSG00000166710	B2M	0.405674	0.00460017	-1.63241	5.04e-05	0.00777889
ENSG00000168003	SLC3A2	-0.394677	0.000258354	-1.61243	0.000334673	0.0129663
ENSG00000147206	NXF3	-0.570326	0.000180062	-1.60959	6.66e-05	0.00812798
ENSG00000163481	RNF25	-0.254417	0.0301703	-1.58766	0.00228973	0.0281745
ENSG00000172340	SUCLG2	-0.0503988	0.776806	-1.56911	5.1e-05	0.00777889
ENSG00000127824	TUBA4A	-0.517301	7.49941e-05	-1.55704	0.000381046	0.0134871
ENSG00000103257	SLC7A5	-0.238322	0.117889	-1.55294	0.000430908	0.0139916
ENSG00000107438	PDLIM1	-0.245806	0.0242954	-1.55192	5.95e-05	0.00793663
ENSG00000172247	C1QTNF4	-0.570456	0.101231	-1.54471	5.09e-05	0.00777889
ENSG00000155629	PIK3AP1	0.335783	0.00513076	-1.53109	0.00015162	0.0104733
ENSG00000175104	TRAF6	-0.600596	0.00042584	-1.50507	0.00624084	0.0458195
ENSG00000134013	LOXL2	0.27696	0.0203601	-1.49215	0.00137604	0.0224723
ENSG00000141753	IGFBP4	0.141111	0.301552	-1.46887	8.2e-05	0.0090428
ENSG00000266094	RASSF5	1.0358	8.75983e-20	-1.4686	0.000121462	0.00966
ENSG00000182718	ANXA2	-0.337722	0.04938	-1.45846	6.5e-05	0.00812798
ENSG00000113140	SPARC	0.299839	0.0117675	-1.45138	7.07e-05	0.00844233
ENSG00000128340	RAC2	-0.0076485	0.96146	-1.43863	0.000353622	0.0130306
ENSG00000124831	LRRFIP1	-0.568409	0.00243118	-1.43754	0.000241244	0.011652
ENSG00000138363	ATIC	-0.650009	1.47715e-06	-1.43297	7.63e-05	0.00875575
ENSG00000149781	FERMT3	-0.373169	0.0208714	-1.41989	0.000253797	0.0119284
ENSG00000231500	RPS18	0.169994	0.14017	-1.41514	0.000236456	0.011652
ENSG00000142657	PGD	-0.418497	0.000777842	-1.39961	0.000226621	0.0114467
ENSG00000169019	COMMD8	-0.965249	1.77516e-10	-1.39127	0.00270831	0.0300959
ENSG00000171488	LRRC8C	0.0557604	0.809161	-1.39046	0.000155813	0.0104733
ENSG00000167642	SPINT2	0.201043	0.0883839	-1.38544	0.00093682	0.0195336
ENSG00000171608	PIK3CD	0.0539472	0.729218	-1.38159	0.00081725	0.0185525
ENSG00000144591	GMPPA	-0.307841	0.0127646	-1.379	0.000367797	0.013099
ENSG00000092621	PHGDH	-0.792872	1.53906e-11	-1.35586	0.000218219	0.0114467
ENSG00000115677	HDLBP	-0.438879	0.00192318	-1.33695	9.58e-05	0.00966
ENSG00000179218	CALR	-0.222112	0.0629996	-1.33288	0.000100622	0.00966
ENSG00000135913	USP37	-0.648748	0.000467496	-1.32582	0.000106497	0.00966
ENSG00000105372	RPS19	0.199647	0.0908339	-1.32227	0.000319738	0.0125873
ENSG00000109814	UGDH	0.190115	0.293803	-1.31321	0.000133271	0.0101031
ENSG00000153048	CARHSP1	-0.466469	0.000124299	-1.29792	0.000196154	0.0114467
ENSG00000127837	AAMP	-0.552175	1.50614e-05	-1.29228	0.00011861	0.00966
ENSG00000092929	UNC13D	-0.0453326	0.818554	-1.28666	0.000151608	0.0104733
ENSG00000111424	VDR	-0.458059	0.000206812	-1.28213	0.000121348	0.00966
ENSG00000115685	PPP1R7	-0.371641	0.00943348	-1.27966	0.000122672	0.00966
ENSG00000166888	STAT6	-0.0929301	0.492652	-1.27789	0.000122193	0.00966
ENSG00000058866	DGKG	-0.504625	0.000959828	-1.27728	0.000120615	0.00966
ENSG00000115902	SLC1A4	0.656879	4.13832e-11	-1.27254	0.00080895	0.0185525
ENSG00000135932	CAB39	-0.108218	0.560855	-1.25846	0.000298101	0.0125873
ENSG00000122694	GLIPR2	0.513515	9.00863e-06	-1.25131	0.0001342	0.0101031
ENSG00000118257	NRP2	-0.0444437	0.818349	-1.2486	0.000235486	0.011652
ENSG00000154917	RAB6B	-0.0671771	0.617955	-1.2448	0.00184666	0.0251514
ENSG00000171867	PRNP	0.376731	0.00611438	-1.23997	0.000138659	0.0101031
ENSG00000067066	SP100	0.072583	0.770179	-1.23833	0.000431378	0.0139916
ENSG00000006652	IFRD1	0.704562	1.85804e-06	-1.23794	0.000139195	0.0101031
ENSG00000051108	HERPUD1	-0.445719	5.34989e-05	-1.23504	0.0018185	0.0248268
ENSG00000105383	CD33	-0.180256	0.102345	-1.23472	0.000158908	0.0104733
ENSG00000115415	STAT1	-0.526638	0.000152271	-1.22869	0.00048096	0.0144518
ENSG00000123992	DNPEP	-0.0287415	0.878539	-1.22364	0.000265026	0.0122783
ENSG00000128815	WDFY4	-0.147815	0.335108	-1.22188	0.000895276	0.0193699
ENSG00000140575	IQGAP1	-0.331876	0.144621	-1.22175	0.000147137	0.0104733
ENSG00000186469	GNG2	-0.272504	0.0437616	-1.21953	0.00187516	0.0253595
ENSG00000147852	VLDLR	0.164995	0.426768	-1.21717	0.000317341	0.0125873
ENSG00000114805	PLCH1	-0.159971	0.549473	-1.21654	0.000200108	0.0114467
ENSG00000160789	LMNA	-0.766988	1.21369e-06	-1.20428	0.000188864	0.0114467
ENSG00000115020	PIKFYVE	-0.203581	0.381872	-1.2019	0.000180688	0.0112616
ENSG00000159307	SCUBE1	-0.355569	0.00688099	-1.19839	0.00304915	0.0310547
ENSG00000166794	PPIB	-0.614446	3.2593e-08	-1.19563	0.000166592	0.010733
ENSG00000181915	ADO	-0.564536	5.81695e-08	-1.18336	0.00163729	0.0237286
ENSG00000122862	SRGN	0.442373	0.00429345	-1.18286	0.000221188	0.0114467
ENSG00000240065	PSMB9	0.141006	0.327651	-1.18245	0.000223405	0.0114467
ENSG00000101265	RASSF2	-0.066598	0.655887	-1.18205	0.000778373	0.018143
ENSG00000159658	EFCAB14	-0.0413709	0.801334	-1.1801	0.000242242	0.011652
ENSG00000074842	MYDGF	-0.715434	4.07871e-08	-1.17541	0.000190347	0.0114467
ENSG00000115318	LOXL3	-0.146698	0.273362	-1.1751	0.000393212	0.0135824
ENSG00000130768	SMPDL3B	0.0910073	0.460563	-1.16958	0.000320499	0.0125873
ENSG00000204217	BMPR2	0.038524	0.874166	-1.15509	0.000362618	0.0130306
ENSG00000184743	ATL3	-0.493344	2.63172e-06	-1.1471	0.00024125	0.011652
ENSG00000164111	ANXA5	-0.0236271	0.871486	-1.14089	0.00028162	0.012553
ENSG00000115271	GCA	-0.104179	0.517089	-1.14076	0.000296497	0.0125873
ENSG00000155660	PDIA4	-0.354479	0.0025624	-1.13406	0.000227576	0.0114467
ENSG00000090520	DNAJB11	-0.717281	1.16516e-08	-1.13157	0.00022494	0.0114467
ENSG00000086289	EPDR1	-0.437894	9.76153e-05	-1.12092	0.000514167	0.0148028
ENSG00000050405	LIMA1	-0.12555	0.556818	-1.1113	0.000224746	0.0114467
ENSG00000178695	KCTD12	0.123714	0.381349	-1.10861	0.000913289	0.0193699
ENSG00000177954	RPS27	0.457259	3.72894e-05	-1.10452	0.000451563	0.0141426
ENSG00000178074	C2orf69	-0.170597	0.322154	-1.10328	0.00110571	0.0210635
ENSG00000102580	DNAJC3	-0.502783	0.0132006	-1.10009	0.0013915	0.0224723
ENSG00000003402	CFLAR	-0.179162	0.162246	-1.09441	0.000351533	0.0130306
ENSG00000240344	PPIL3	-0.16712	0.345859	-1.09118	0.000273807	0.0123623
ENSG00000168393	DTYMK	-0.145487	0.401932	-1.08585	0.000361913	0.0130306
ENSG00000163162	RNF149	-0.297293	0.0211262	-1.08563	0.000673323	0.0172444
ENSG00000198157	HMGN5	-0.945295	4.13639e-07	-1.07263	0.00100605	0.0200999
ENSG00000142655	PEX14	-0.452769	0.00211062	-1.06819	0.000361196	0.0130306
ENSG00000120885	CLU	0.81749	1.32062e-11	-1.0678	0.000399132	0.013613
ENSG00000140365	COMMD4	-0.183192	0.249674	-1.06776	0.00131968	0.022256
ENSG00000167460	TPM4	-0.15372	0.193853	-1.06509	0.000922199	0.0193699
ENSG00000132109	TRIM21	-0.596037	1.84642e-07	-1.06059	0.00307921	0.0310884
ENSG00000138376	BARD1	-0.186138	0.467155	-1.06029	0.000294234	0.0125873
ENSG00000108389	MTMR4	-0.186039	0.119531	-1.05471	0.00172851	0.0243788
ENSG00000157637	SLC38A10	-0.260628	0.206686	-1.05286	0.0054893	0.0428824
ENSG00000079819	EPB41L2	-0.456129	0.00372358	-1.05111	0.000484284	0.0144518
ENSG00000163466	ARPC2	0.0205914	0.886008	-1.04793	0.000314816	0.0125873
ENSG00000111540	RAB5B	0.391682	0.000648478	-1.04423	0.000351992	0.0130306
ENSG00000145491	ROPN1L	0.0662474	0.667806	-1.0389	0.000314856	0.0125873
ENSG00000100994	PYGB	-0.894656	1.65345e-13	-1.03557	0.00068391	0.0172444
ENSG00000152601	MBNL1	-0.383161	0.00972661	-1.03475	0.000311211	0.0125873
ENSG00000151131	C12orf45	-0.26629	0.0363774	-1.03449	0.000508812	0.014735
ENSG00000136026	CKAP4	0.189463	0.131402	-1.02983	0.00128783	0.0219775
ENSG00000181019	NQO1	-0.211014	0.0618636	-1.02908	0.00681134	0.0471719
ENSG00000105193	RPS16	-0.103595	0.470541	-1.01929	0.000649477	0.0168992
ENSG00000167004	PDIA3	-0.540993	1.74762e-05	-1.01305	0.000436781	0.0139916
ENSG00000173674	EIF1AX	-0.893153	3.08703e-10	-1.01018	0.00160491	0.023536
ENSG00000070081	NUCB2	-0.0813416	0.697615	-0.995571	0.00040864	0.0136229
ENSG00000119397	CNTRL	-0.104911	0.742496	-0.994085	0.00297181	0.0307588
ENSG00000131871	SELENOS	-0.449025	8.92212e-05	-0.985434	0.00396995	0.0361903
ENSG00000123485	HJURP	-0.171061	0.388903	-0.981867	0.000407702	0.0136229
ENSG00000185950	IRS2	-0.344129	0.0220364	-0.981296	0.00106249	0.0206519
ENSG00000115310	RTN4	-0.183334	0.1044	-0.980553	0.000398553	0.013613
ENSG00000147526	TACC1	-0.757994	1.41284e-09	-0.972508	0.0019903	0.0262354
ENSG00000166598	HSP90B1	-0.305196	0.0974778	-0.970883	0.00046504	0.0144137
ENSG00000143870	PDIA6	-0.295258	0.0132783	-0.969929	0.000516318	0.0148028
ENSG00000163516	ANKZF1	-0.682669	8.40667e-08	-0.961669	0.000434041	0.0139916
ENSG00000026508	CD44	0.44624	0.000131336	-0.957764	0.000668537	0.0172444
ENSG00000128590	DNAJB9	0.326466	0.108471	-0.953704	0.000741021	0.0174857
ENSG00000138646	HERC5	0.374437	0.209555	-0.945241	0.00207195	0.0268791
ENSG00000153827	TRIP12	-0.232253	0.193594	-0.945192	0.00178353	0.0246039
ENSG00000116209	TMEM59	0.0285228	0.852507	-0.939858	0.000857201	0.0191253
ENSG00000163430	FSTL1	0.181756	0.17706	-0.93752	0.0037301	0.0350527
ENSG00000126878	AIF1L	-0.209569	0.0701829	-0.936763	0.000486432	0.0144518
ENSG00000156313	RPGR	-0.674739	0.00121283	-0.933297	0.000494786	0.0145493
ENSG00000163154	TNFAIP8L2	-0.498933	4.65774e-05	-0.93132	0.000575892	0.015785
ENSG00000168918	INPP5D	-0.357157	0.00212186	-0.930799	0.00198734	0.0262354
ENSG00000010610	CD4	-0.498731	2.26727e-06	-0.930064	0.0012001	0.0216712
ENSG00000153132	CLGN	0.0853197	0.717172	-0.925637	0.00505151	0.0411097
ENSG00000079246	XRCC5	-0.67548	4.21149e-06	-0.920209	0.000815895	0.0185525
ENSG00000173744	AGFG1	0.34749	0.00727974	-0.918681	0.00174522	0.0244616
ENSG00000115806	GORASP2	0.0102142	0.949183	-0.918049	0.000896508	0.0193699
ENSG00000102879	CORO1A	-0.895988	6.91623e-07	-0.917173	0.000733282	0.0174857
ENSG00000154429	CCSAP	0.0574791	0.736934	-0.915444	0.000720526	0.0174857
ENSG00000105968	H2AFV	0.189847	0.0988294	-0.909318	0.000984454	0.0198763
ENSG00000132323	ILKAP	-0.342795	0.00470164	-0.903048	0.00079112	0.018218
ENSG00000213719	CLIC1	-0.556265	2.92448e-08	-0.895202	0.000877125	0.0192224
ENSG00000196924	FLNA	-0.260155	0.0588202	-0.89226	0.00139926	0.0224723
ENSG00000134419	RPS15A	0.323119	0.0295981	-0.890554	0.000683681	0.0172444
ENSG00000160049	DFFA	-0.134427	0.253453	-0.885438	0.00070985	0.0174857
ENSG00000100427	MLC1	-0.554035	1.94174e-06	-0.879429	0.00122493	0.0216712
ENSG00000167461	RAB8A	-0.984631	5.12086e-17	-0.876122	0.00157174	0.0232278
ENSG00000130429	ARPC1B	-0.115879	0.508937	-0.875924	0.00135296	0.0224723
ENSG00000168394	TAP1	0.458567	4.98737e-05	-0.872377	0.00503626	0.0411097
ENSG00000105122	RASAL3	0.239824	0.0810929	-0.871577	0.000929906	0.0194601
ENSG00000163428	LRRC58	0.315201	0.106448	-0.86549	0.000693546	0.0172904
ENSG00000166037	CEP57	-0.166736	0.480016	-0.861921	0.00256404	0.0290557
ENSG00000121060	TRIM25	-0.791631	6.72641e-12	-0.860678	0.000714646	0.0174857
ENSG00000180228	PRKRA	0.526488	1.72864e-05	-0.859139	0.00178131	0.0246039
ENSG00000232112	TMA7	-0.183556	0.0964285	-0.85823	0.00306707	0.0310884
ENSG00000116701	NCF2	-0.507004	0.000114518	-0.856409	0.00287109	0.0303403
ENSG00000116212	LRRC42	-0.325132	0.0034321	-0.854312	0.000875778	0.0192224
ENSG00000119042	SATB2	0.0219677	0.906023	-0.851181	0.000835962	0.0187977
ENSG00000118246	FASTKD2	-0.381672	0.062246	-0.847302	0.000948873	0.0196364
ENSG00000127022	CANX	-0.631014	1.26951e-08	-0.847259	0.000866868	0.0191916
ENSG00000156110	ADK	-0.359083	0.000817193	-0.843816	0.00116331	0.0214191
ENSG00000096717	SIRT1	-0.498393	0.0048992	-0.840539	0.000842091	0.0188615
ENSG00000110700	RPS13	0.23367	0.0648516	-0.836581	0.00151148	0.0228795
ENSG00000142192	APP	-0.525749	0.000109625	-0.831514	0.00090408	0.0193699
ENSG00000182400	TRAPPC6B	-0.669256	0.0003046	-0.823201	0.000945073	0.0196342
ENSG00000107902	LHPP	0.00796455	0.97118	-0.820556	0.00676616	0.0471719
ENSG00000153113	CAST	0.493689	0.00166275	-0.819913	0.000912639	0.0193699
ENSG00000115091	ACTR3	-0.217096	0.098185	-0.818385	0.000919248	0.0193699
ENSG00000100664	EIF5	0.280171	0.0615826	-0.817977	0.00133321	0.0223269
ENSG00000137168	PPIL1	-0.629912	6.47624e-10	-0.817542	0.000993316	0.0199206
ENSG00000115307	AUP1	-0.73259	4.21069e-09	-0.817286	0.000910046	0.0193699
ENSG00000165801	ARHGEF40	0.607804	6.18677e-08	-0.817229	0.000919757	0.0193699
ENSG00000103540	CCP110	-0.42677	0.0360039	-0.814267	0.000913454	0.0193699
ENSG00000163956	LRPAP1	-0.170916	0.182306	-0.814004	0.00101661	0.0201981
ENSG00000213516	RBMXL1	-0.44613	0.00531946	-0.812332	0.00228515	0.0281745
ENSG00000149806	FAU	-0.0717814	0.680247	-0.811183	0.00287846	0.0303403
ENSG00000114439	BBX	-0.176924	0.492332	-0.807029	0.00114307	0.0213497
ENSG00000110619	CARS	-0.625112	2.2473e-06	-0.806818	0.000961576	0.0196364
ENSG00000170144	HNRNPA3	-0.638448	3.9018e-07	-0.804901	0.00138549	0.0224723
ENSG00000150961	SEC24D	-0.624178	2.24136e-06	-0.80487	0.00236685	0.0285399
ENSG00000167900	TK1	-0.527565	0.000505467	-0.801136	0.00150074	0.0228795
ENSG00000175634	RPS6KB2	0.199702	0.235343	0.808288	0.00254397	0.0290397
ENSG00000131899	LLGL1	0.494601	0.00216775	0.812599	0.00195191	0.025968
ENSG00000145386	CCNA2	-0.0366204	0.830829	0.820608	0.0009936	0.0199206
ENSG00000184445	KNTC1	-0.307837	0.221285	0.821893	0.00701258	0.0477555
ENSG00000028839	TBPL1	0.441117	0.00279456	0.823287	0.00363467	0.0345053
ENSG00000125772	GPCPD1	0.506328	0.00595493	0.823991	0.00152992	0.0229048
ENSG00000178105	DDX10	-0.715983	0.0224018	0.825215	0.00113495	0.0212673
ENSG00000225663	MCRIP1	0.211395	0.487676	0.827368	0.000961115	0.0196364
ENSG00000159399	HK2	-0.747354	1.86324e-09	0.830868	0.00214113	0.0273969
ENSG00000198604	BAZ1A	0.01737	0.950265	0.832695	0.00125876	0.0218058
ENSG00000171204	TMEM126B	0.162738	0.373217	0.832808	0.00123212	0.0216712
ENSG00000136854	STXBP1	0.497818	2.61474e-05	0.833985	0.00102798	0.0201981
ENSG00000142453	CARM1	0.17306	0.224496	0.843325	0.00196862	0.0261298
ENSG00000196576	PLXNB2	0.735348	1.41171e-05	0.84544	0.0044915	0.0390216
ENSG00000164323	CFAP97	0.183229	0.327609	0.846223	0.0010321	0.0201981
ENSG00000171503	ETFDH	-0.593776	2.44181e-05	0.846226	0.000818588	0.0185525
ENSG00000241945	PWP2	-0.830387	7.5361e-11	0.852005	0.000958281	0.0196364
ENSG00000164654	MIOS	0.423979	0.0471751	0.852612	0.00179821	0.0246084
ENSG00000181744	C3orf58	0.168349	0.385532	0.853613	0.00541235	0.0425713
ENSG00000120696	KBTBD7	-0.290741	0.184916	0.856319	0.00072726	0.0174857
ENSG00000205189	ZBTB10	-0.0930496	0.725104	0.856905	0.00280773	0.0303192
ENSG00000204304	PBX2	-0.196939	0.158186	0.858288	0.00122602	0.0216712
ENSG00000134759	ELP2	-0.372908	0.0143332	0.858993	0.00071701	0.0174857
ENSG00000114993	RTKN	-0.13663	0.320625	0.860635	0.00125844	0.0218058
ENSG00000151348	EXT2	0.603894	1.11561e-08	0.861879	0.00327023	0.0321087
ENSG00000151470	C4orf33	0.0946215	0.696229	0.86299	0.000736056	0.0174857
ENSG00000197586	ENTPD6	0.0502548	0.74039	0.864986	0.00301368	0.0309918
ENSG00000099256	PRTFDC1	0.00856193	0.977107	0.865287	0.00147344	0.0228795
ENSG00000010017	RANBP9	0.229493	0.0658082	0.865756	0.000699562	0.0173649
ENSG00000140332	TLE3	-0.158964	0.186733	0.865794	0.00254232	0.0290397
ENSG00000153721	CNKSR3	-0.1058	0.445257	0.866948	0.000688693	0.0172444
ENSG00000003096	KLHL13	-0.0083421	0.976919	0.867634	0.00117963	0.0216103
ENSG00000173548	SNX33	0.232004	0.0502603	0.869859	0.000678434	0.0172444
ENSG00000100625	SIX4	0.103302	0.597684	0.871285	0.00592497	0.0446932
ENSG00000170852	KBTBD2	-0.0990755	0.539026	0.877079	0.00239129	0.0285399
ENSG00000079459	FDFT1	-0.376438	0.000576932	0.878232	0.00536325	0.0424178
ENSG00000129691	ASH2L	-0.441893	0.000263274	0.878561	0.00151036	0.0228795
ENSG00000100299	ARSA	0.357641	0.108471	0.88044	0.000686999	0.0172444
ENSG00000123104	ITPR2	-0.157397	0.471811	0.880461	0.0028739	0.0303403
ENSG00000051620	HEBP2	0.513466	1.89182e-05	0.884728	0.000865511	0.0191916
ENSG00000101019	UQCC1	-0.619593	1.43099e-09	0.886306	0.0040495	0.036572
ENSG00000101246	ARFRP1	-0.514198	0.0007036	0.888121	0.000783417	0.0181867
ENSG00000078142	PIK3C3	-0.0351194	0.887075	0.890837	0.00072455	0.0174857
ENSG00000164163	ABCE1	-0.138656	0.479651	0.891481	0.00078946	0.018218
ENSG00000129292	PHF20L1	0.581146	0.00056186	0.895085	0.000602873	0.0160785
ENSG00000112679	DUSP22	0.182334	0.112883	0.895827	0.00110517	0.0210635
ENSG00000104885	DOT1L	-0.179842	0.211558	0.897426	0.000598245	0.0160785
ENSG00000100376	FAM118A	-0.354988	0.0101785	0.898303	0.00395971	0.0361544
ENSG00000157216	SSBP3	0.207358	0.0857303	0.903158	0.00211286	0.0272251
ENSG00000070785	EIF2B3	-0.489118	0.00201827	0.90318	0.00247121	0.028879
ENSG00000134758	RNF138	0.15163	0.338959	0.903293	0.00428899	0.0380697
ENSG00000108578	BLMH	-0.455862	0.000164374	0.90568	0.00128569	0.0219775
ENSG00000136161	RCBTB2	0.166408	0.236982	0.908267	0.00102917	0.0201981
ENSG00000170873	MTSS1	0.249116	0.0312841	0.912383	0.000737889	0.0174857
ENSG00000153201	RANBP2	0.154926	0.578143	0.922391	0.000828734	0.0187085
ENSG00000239306	RBM14	-0.21127	0.0820266	0.922724	0.000548283	0.0155043
ENSG00000151458	ANKRD50	-0.255614	0.274402	0.92709	0.000651331	0.0168992
ENSG00000174080	CTSF	0.763713	1.59848e-10	0.929997	0.000984184	0.0198763
ENSG00000109787	KLF3	0.0709738	0.723292	0.933213	0.00230471	0.0281874
ENSG00000145414	NAF1	-0.376617	0.00227764	0.937449	0.000504959	0.0146976
ENSG00000169710	FASN	-0.080026	0.724058	0.940924	0.000618685	0.0162987
ENSG00000111906	HDDC2	0.452008	0.000233205	0.942355	0.000477227	0.0144518
ENSG00000155307	SAMSN1	-0.273689	0.139833	0.950109	0.000483636	0.0144518
ENSG00000165097	KDM1B	-0.0473026	0.783983	0.95143	0.000453828	0.0141426
ENSG00000176978	DPP7	0.172149	0.547518	0.955742	0.000967079	0.0196639
ENSG00000124228	DDX27	-0.955756	3.47613e-11	0.959288	0.000439684	0.0139916
ENSG00000178537	SLC25A20	-0.198882	0.0931018	0.963618	0.00305903	0.0310884
ENSG00000153094	BCL2L11	0.0488393	0.709658	0.969398	0.000471347	0.0144518
ENSG00000128394	APOBEC3F	0.0479451	0.76777	0.97113	0.000483729	0.0144518
ENSG00000105639	JAK3	0.402259	0.000413251	0.972307	0.000484414	0.0144518
ENSG00000174004	NRROS	-0.214551	0.218981	0.97751	0.0009623	0.0196364
ENSG00000087095	NLK	-0.0100767	0.962735	0.983927	0.00107535	0.0207308
ENSG00000085185	BCORL1	-0.000568343	1	0.99664	0.001024	0.0201981
ENSG00000115904	SOS1	0.526406	0.0147272	1.0023	0.00428717	0.0380697
ENSG00000164442	CITED2	-0.0105434	0.95273	1.00251	0.000403594	0.013613
ENSG00000153395	LPCAT1	0.180601	0.132613	1.01031	0.0071047	0.0479839
ENSG00000169756	LIMS1	-0.00517121	0.982292	1.01967	0.000348154	0.0130306
ENSG00000007038	PRSS21	0.246853	0.0446711	1.02084	0.000746441	0.0175318
ENSG00000221988	PPT2	0.331181	0.00162788	1.02576	0.000498797	0.0145923
ENSG00000155393	HEATR3	-0.0563527	0.73466	1.04198	0.00104065	0.0202963
ENSG00000181396	OGFOD3	0.137978	0.411283	1.04308	0.000678535	0.0172444
ENSG00000129187	DCTD	0.119458	0.324841	1.04428	0.000312917	0.0125873
ENSG00000003393	ALS2	-0.13556	0.493016	1.05339	0.000922215	0.0193699
ENSG00000198728	LDB1	0.245722	0.0460253	1.06419	0.00107739	0.0207308
ENSG00000004766	VPS50	0.440251	0.161734	1.06692	0.00074909	0.0175318
ENSG00000139668	WDFY2	-0.385696	0.000338982	1.06692	0.000272163	0.0123623
ENSG00000011566	MAP4K3	0.0437188	0.876449	1.0686	0.000724273	0.0174857
ENSG00000141696	P3H4	0.607111	4.54251e-08	1.07642	0.000595164	0.0160785
ENSG00000118971	CCND2	-0.472132	1.29765e-05	1.08339	0.000284599	0.012553
ENSG00000121931	LRIF1	0.0516228	0.818417	1.08601	0.000363602	0.0130306
ENSG00000126561	STAT5A	-0.287228	0.011562	1.09009	0.000247073	0.0117084
ENSG00000008083	JARID2	-0.562994	6.90931e-06	1.09866	0.00024385	0.011652
ENSG00000087299	L2HGDH	0.0863709	0.661545	1.11223	0.00125211	0.0218058
ENSG00000111911	HINT3	0.178259	0.248858	1.11989	0.000216398	0.0114467
ENSG00000151466	SCLT1	-0.205389	0.151537	1.12366	0.000218332	0.0114467
ENSG00000157554	ERG	-0.191453	0.159127	1.14979	0.000300239	0.0125873
ENSG00000137692	DCUN1D5	-0.326596	0.00622531	1.16583	0.000601399	0.0160785
ENSG00000082212	ME2	-0.00116752	0.998234	1.17732	0.000208058	0.0114467
ENSG00000184058	TBX1	0.435723	0.00714578	1.17995	0.000572645	0.015785
ENSG00000104998	IL27RA	0.170955	0.2286	1.18284	0.000185303	0.011425
ENSG00000134901	KDELC1	0.316233	0.0198122	1.18423	0.000177114	0.0111601
ENSG00000151702	FLI1	0.0778361	0.547057	1.19349	0.000162273	0.0105735
ENSG00000159840	ZYX	0.017975	0.935242	1.19862	0.000362257	0.0130306
ENSG00000166582	CENPV	0.228914	0.0341821	1.20162	0.000169016	0.0107682
ENSG00000164039	BDH2	0.0464959	0.844851	1.20188	0.000319675	0.0125873
ENSG00000132334	PTPRE	-0.0447789	0.807884	1.22889	0.000154921	0.0104733
ENSG00000144711	IQSEC1	0.496629	2.54018e-05	1.27149	0.000301747	0.0125873
ENSG00000165410	CFL2	-0.0305125	0.864398	1.27542	0.000122161	0.00966
ENSG00000179361	ARID3B	0.370061	0.00075442	1.29794	0.000122982	0.00966
ENSG00000130396	AFDN	0.227401	0.306297	1.33203	0.000107595	0.00966
ENSG00000172578	KLHL6	-0.353487	0.012065	1.33875	0.000559756	0.0156304
ENSG00000145990	GFOD1	-0.32159	0.0332715	1.35141	0.000610017	0.0161937
ENSG00000165572	KBTBD6	-0.259929	0.10555	1.38975	0.000265523	0.0122783
ENSG00000167984	NLRC3	-0.172746	0.199066	1.39643	0.000199364	0.0114467
ENSG00000196453	ZNF777	0.215762	0.0907629	1.39996	0.00341247	0.0330525
ENSG00000196782	MAML3	-0.205187	0.200569	1.42477	0.00146386	0.0228713
ENSG00000065243	PKN2	0.327874	0.191081	1.45669	0.000130328	0.0100987
ENSG00000172331	BPGM	0.264998	0.0520845	1.51507	0.000192571	0.0114467
ENSG00000121039	RDH10	0.0673969	0.610913	1.51693	5.56e-05	0.00777889
ENSG00000173757	STAT5B	0.0299101	0.844655	1.54396	7.24e-05	0.00847294
ENSG00000111670	GNPTAB	0.416217	0.00892144	1.55768	0.000878315	0.0192224
ENSG00000198771	RCSD1	-0.214637	0.0879102	1.69376	3.36e-05	0.00777889
ENSG00000008277	ADAM22	0.502173	0.00175277	1.69931	3.63e-05	0.00777889
ENSG00000171992	SYNPO	-0.146725	0.253014	1.81194	2.52e-05	0.00721542
ENSG00000054598	FOXC1	0.0329536	0.857294	1.85191	0.00192118	0.0257384
ENSG00000134215	VAV3	0.261843	0.0807852	1.88054	4.81e-05	0.00777889
ENSG00000170542	SERPINB9	0.192947	0.170623	1.88612	0.00213069	0.0273319
ENSG00000179348	GATA2	0.196493	0.190001	2.00111	2.28e-05	0.00721542
ENSG00000135269	TES	0.194948	0.179828	2.27884	8.35e-06	0.00542529
ENSG00000196358	NTNG2	0.269641	0.140182	2.28817	1.05e-05	0.00542529
ENSG00000163220	S100A9	0.234314	0.0549622	2.4293	5.29e-05	0.00777889
ENSG00000099810	MTAP	-0.469066	0.0277475	2.67602	5.48e-05	0.00777889
ENSG00000128322	IGLL1	0.100923	0.649098	4.16621	0.00019435	0.0114467
